1 **Title:** Complexity matching: brain signals mirror environment information patterns during music  
2 listening and reward

3 **Abbreviated title (50 character max):** Brain-environment complexity matching

4 **Author Names and Affiliations:** Sarah M. Carpentier<sup>1</sup>, Andrea R. McCulloch<sup>1</sup>, Tanya M.  
5 Brown<sup>1</sup>, Petra Ritter<sup>2</sup>, Zhang Wang<sup>1</sup>, Valorie Salimpoor<sup>1</sup>, Kelly Shen<sup>1</sup>, Anthony Randal  
6 McIntosh<sup>1</sup>

7 <sup>1</sup> Rotman Research Institute, Baycrest Centre, University of Toronto

8 <sup>2</sup>Charité Universitätsmedizin Berlin

9 **Corresponding author:** rmcintosh@research.baycrest.org

10 **Number of pages:** 39

11 **Number of figures:** 11

12 **Number of Words**

13 **Abstract:** 248

14 **Introduction:** 587

15 **Discussion:** 1473

16 **Conflict of interest statement:** The authors declare no competing financial interests.

17 **Acknowledgements:** The authors wish to thank Natasa Kovačević for her work on the EEG  
18 preprocessing pipeline, as well as essential input at multiple levels of the Matlab scripting  
19 process.

20

21 Abstract

22 Understanding how the human brain integrates information from the environment with  
23 ongoing, internal brain signals in order to produce individual perspective is an essential element  
24 of understanding the human mind. Brain signal complexity, measured with multiscale entropy,  
25 has been employed as a measure of information processing in the brain (Carpentier et al., 2016),  
26 and we propose that it can also be used to measure the information available from a stimulus. We  
27 can directly assess the correspondence, or functional isomorphism, between brain signal  
28 complexity and stimulus complexity as an indication of how well the brain reflects the content of  
29 the environment in an analysis that we termed *complexity matching*. Music makes an ideal  
30 stimulus input because it is a multidimensional, complex signal, and because of its emotion and  
31 reward-inducing potential. We found that electroencephalography (EEG) complexity was lower  
32 and more closely resembled the musical complexity when participants performed a perceptual  
33 task that required them to closely track the acoustics, compared to an emotional task that asked  
34 them to think about how the music made them feel. Music-derived reward scores on the  
35 Barcelona Music Reward Questionnaire (Mas-Herrero et al., 2013) correlated with worse  
36 complexity matching and higher EEG complexity. Compared to perceptual-level processing,  
37 emotional and reward responses are associated with additional internal information processes  
38 above and beyond those in the external stimulus.



61 brain signals and those in the individual's environment. Furthermore, we were interested in  
62 whether this correspondence would be related to the cognitive-affective state of the individual.

63 Music offers an ideal stimulus from which to measure information content. Complicated  
64 music structures are created following application of combination rules to subordinate motifs.  
65 This makes it possible to describe a functional isomorphism between the brain and environment  
66 information by calculating music complexity and comparing it to the complexity of brain signals  
67 of the listener. We propose that this measure of comparison between EEG complexity and music  
68 complexity, or *complexity matching*, will provide a relative indication of the degree to which  
69 environmental information structure is reflected in brain signal structure.

70 Complexity matching is calculated as Procrustes distance (Gower, 1975) between the  
71 music and EEG multiscale entropy (MSE). MSE calculates sample entropy at multiple  
72 timescales (Costa et al., 2002, 2005). Like brain signals, music also has structure at multiple  
73 timescales, and MSE seems an appropriate measure of complexity for a given music passage.  
74 Procrustes distance produces a quantity of similarity between the structure of the music and the  
75 structure of the ensuing brain signals. A relatively high value of matching together with lower  
76 EEG MSE would suggest that the brain has activated the necessary information processing  
77 resources for immediate perception, and little else. Conversely, relatively lower complexity  
78 matching but high neural complexity would suggest that internal processes, different from  
79 immediate stimulus perception, dominate the neural response. This metric was inspired by the  
80 ideas in Tononi et al. (Tononi et al., 1996)

81 The level of brain-environment information integration may be related to cognition and  
82 subjective perspective. To examine the relationship between brain-environment matching and  
83 cognitive-affective state, we calculated complexity matching while participants performed a

84 music perception task and a music emotion evocation task. We expect that active attention to the  
85 acoustics of the music during the perceptual task will be accompanied by brain signal complexity  
86 that more closely resembles the music, compared to the emotional task that involves additional  
87 internally processes and, therefore, will provide less of a match to the environment.

88 We also analyzed the relationship between complexity matching and music-derived  
89 reward scores from the Barcelona Music Reward Questionnaire (BMRQ). The ability to perceive  
90 musical structure is essential to the enjoyment of music (Meyer, 1956; Huron, 2006): therefore, it  
91 is possible that a certain minimum quantity of complexity matching may be required for the  
92 listener to have the necessary appreciation of the underlying ‘gist’ or skeleton structure of the  
93 piece. Perhaps without sufficient neural integration of music signals, the listener would be unable  
94 to perceive separate noise sounds as unified. In accordance with our prediction that the emotional  
95 task will be associated with a lower complexity match than the perceptual task, we expect that  
96 higher music reward involves internally-driven, individual responses and therefore will correlate  
97 with higher complexity and lower complexity matching.

98

## 99 **Materials and Methods**

### 100 *Participants*

101 Eighteen healthy young adults aged 19-35 (M = 26; 10 female) were recruited from the  
102 Greater Toronto Area to take part in the study and provided written informed consent in  
103 accordance with the joint Baycrest Centre-University of Toronto Research Ethics Committee.  
104 Prior to arriving to the lab for the experimental session, participants completed an online  
105 questionnaire about their music listening habits, and musical training was assessed as a 1-5 scale:  
106 1) No formal training, cannot play an instrument; 2) Can play an instrument without formal

107 training; 3) Less than 1 year of formal music training; 4) Between 1-5 years of formal training;  
108 and 5) More than 5 years of formal training.

### 109 *Barcelona Music Reward Questionnaire*

110 Music reward is highly individual, and the BMRQ was developed to describe some of the  
111 main facets of the variance in how people experience reward from music listening (Mas-Herrero  
112 et al., 2013). Participants are asked to indicate the level of agreement with each of 20 statements  
113 by using a 5-point scale ranging from (1) “fully disagree” to (5) “fully agree,” with a higher  
114 score indicating the subject experiences more music reward and a lower score indicating they do  
115 not experience music associated rewarding feelings. These statements represent five major  
116 factors of music reward: (1) Emotional Evocation; (2) Mood Regulation; (3) Musical Seeking;  
117 (4) Social Reward; and (5) Sensory-Motor.

118 *Emotional Evocation* refers to the idea that music can both convey and induce emotion  
119 (also referred to as emotional contagion), such as joy or sadness, and that listeners might seek out  
120 music that contains emotion (Juslin and Laukka, 2004; Juslin and Västfjäll, 2008; Vuoskoski and  
121 Eerola, 2012). The BMRQ distinguishes evoked feelings, which may be short-lived and vary  
122 across a single music piece; from the way some listeners use music to alter their own longer  
123 lasting mood or hedonic state after the song has finished (e.g. Carter, Wilson, Lawson, & Bulik,  
124 1995; Västfjäll, 2001). *Mood Regulation* refers to the idea that music can be used to comfort,  
125 relieve stress, or enhance relaxation (for a review see Juslin & Sloboda, 2010), and a particular  
126 point has been raised about the use of music in marketing or film to manipulate and induce  
127 hedonic states (Cohen, 2001). *Musical Seeking* can also be referred to as “knowing about music.”  
128 This facet describes that some listeners get reward from extracting, pursuing, sharing, and  
129 seeking information regarding specific music pieces, composers, performers, or other

130 information related to music. Listeners may also experience pleasure when recognizing music  
131 quotations or allusions to other works. *Social Reward* may be gained by music through its  
132 enhancement of social bonds or social cohesion (Cross and Morley, 2009). Lastly, the *Sensory-*  
133 *Motor* facet captures reward experienced by the pull music has over some people to move to  
134 music.

### 135 ***Behaviour Tasks***

136 Forty operatic and classical musical segments were selected after piloting for a range of  
137 emotional reactions of the listener and of pitch and tempo. The pieces spanned a range with only  
138 instruments to both instruments and voice. For this study, we wanted to ensure the range of  
139 individual experience was as broad as possible to get reasonable ranges of arousal and valence  
140 ratings and comparable volatility in the perceptual task. Segment lengths ranged between 0:40-  
141 1:17 min. This choice was made to allow each segment to conclude naturally at the end of a  
142 musical phrase, rather than ending abruptly in the middle. Thirty pieces were selected for the  
143 emotional task and ten pieces for the perceptual task (Table 1). Importantly, there was no  
144 difference in the music complexity (MSE) between the tasks ( $p > 0.1$ ).

**Table 1.** *List of songs for each tasks*

---

#### *Emotional Valence Songs*

- Adams “Nixon in China, ‘Beginning’”
- Adams “Disappointment Lake”
- Bach “No. 3 Aria ‘Es Ist Vollbracht’”
- Barber “Adagio for Strings”
- Brahms “Intermezzo No. 2 in A Major, Op. 118”
- Delibes “Lakmé/Flower Duet”
- Elgar “Variation IX (Adagio) ‘Nimrod’”
- Galvany “Oh My Son”
- Gluck “Armide Act IV Air Sicilien”
- Goodall “Belief”
- Ives “Three Places in New England Orchestral Set No.1”
- Liszt “Totentanz”
- Monteverdi “Zefiro Torna”
- Mozart “Cosi fan tutte”
- Mozetich “The Passion of Angels”
- Penderecki “Threnody to the Victims of Hiroshima”
- Puccini “O soave fanciulla”
- Rameau “Entrée de Polymnie”
- Richter “Vivaldi’s Summer”
- Rossini “Barbiere di Siviglia: Largo Al Factotum”
- Schroer “Field of Stars”
- Schumann-Liszt “Liebeslied (Widmung)”
- Staniland “Solstice Songs No. 2 Interlude”
- Stravinsky “Glorification of the Chosen One”
- Tarrega “Recuerdos De La Alhambra”
- Verdi “Messa Da Requiem: Dies Irae-Tuba Mirum Part 1”
- Verdi “Messa Da Requiem: Dies Irae-Tuba Mirum Part 2”

- Part “Spiegel im Spiegel”
- Wagner “Die Walkurie, Act 3: Ride of the Valkyries”
- Wagner “Tristan Und Isolde/ Act 2 – Prelude”

Perceptual Songs

- Beethoven “Sonata in A Major Op. 69”
- Brahms “Violin Concerto in D, Op 77-3”
- Glass “Glassworks Opening”
- Haydn “Cello Concerto in D Major”
- Mozart “Symphony No. 40 in G-minor, K. 550, Finale”
- Praetorius “Praeambulum”
- Strauss – Der Rosenkavalier Act III/Duet-Denouement and Grand Waltz – Coda”
- Strauss “September”
- Vivaldi “Concerto for Violin, Stings and Harpsichord in G”
- Vivaldi “Stabat Mater”

145

146           During the emotional task, a computer screen in front of participants showed four  
147 quadrants marked on two dimensions: Stimulating-Relaxing, and Pleasant-Unpleasant (Figure 1).  
148 Participants were asked to move a mouse around the quadrant space in a continuous manner  
149 during each song based on *how the music made them feel* on the two dimensions. Participants  
150 were explicitly instructed to report of their own feelings during music listening, and not the  
151 alternative of reporting on what emotions they believe are expressed in the music (emotional  
152 conveyance). The task design was modeled after the *valence-arousal model* of Hunter &  
153 Schellenberg, 2010. They labeled their dimensions high arousal-low arousal and positive  
154 valence-negative valence, and we altered our labels after pilot tests to be more intuitive for  
155 subjects. This valence-arousal model is designed to capture a wide range of emotions. In their  
156 study, difference valence and arousal combinations were associated with multiple different  
157 emotions. For example, high arousal/negative valence was correlated with distress, fear and  
158 anger, low arousal/positive valence was associated with feelings of peace, contentment and  
159 relaxation. Participants from our pilot sample gave similar reports. In this way, it is possible to  
160 capture a larger range of emotions without limiting responses to more specific emotions.

161           The perceptual task mimicked the emotional task, with the difference being participants  
162 were required to assess pitch and tempo for each song (Figure 1). Once again, a screen in front of



163 them displayed four quadrants with two dimensions (High-Low Pitch and Fast-Slow Tempo),  
164 and participants moved a mouse in a continuous manner on the screen based on the pitch and  
165 tempo of each song.



167 **Figure 1.** Participants viewed screens with each of the above quadrants during each task. They were asked to move  
168 a mouse continuously around the quadrant space depending on how the music was making them feel in that moment  
169 (emotional task) or based on their judgments of pitch and tempo (perceptual task).  
170

## 171 **Experimental Procedure**

172 The experimental session began with five perceptual task songs, followed by all thirty  
173 emotional songs, and concluded with the remaining five perceptual songs. Perceptual songs were  
174 always presented in the same order. Emotional songs were presented in one of two  
175 counterbalance orders. Pieces in the first order were curated to have a sense of flow between  
176 them and avoid jarring transitions from one song to the next that may disrupt emotional  
177 experiences. The second order was the reverse of the first. There was no significant effect of  
178 counterbalance order on any of our measures. All stimuli were presented through ER 3A insert  
179 earphones (Etymotic Research, Elk Grove, U.S.A.), while participants were seated in a  
180 soundproof room.

## 181 ***EEG Recording and Pre-Processing***

182 EEG was recorded using a 64+10 Biosemi Active Two System at a sampling rate of 512  
183 Hz. Continuous EEG recordings were bandpass filtered at 0.5-90 Hz, with a notch filter at 55-65  
184 Hz for line noise. The shortest music segment was 40 seconds, so EEG data for each song was  
185 segmented into 4 x 10 s epochs and baseline corrected based on a 200 ms pre-stimulus interval.  
186 Trials with excessive signal amplitude were rejected. Ocular and muscle artifact removal was  
187 performed on the remaining concatenated trials using Independent Component Analysis (ICA)  
188 implemented in EEGLAB (Delorme and Makeig, 2004). The highest number of trials lost for any  
189 subject was 8 out of 40, 7 subjects retained all trials, and the average number rejected trials from  
190 remaining subjects was 2.67, with no difference in trial rejection between conditions.

191 We performed source estimation at the 68 ROIs of the Desikan-Killiany Atlas (Desikan  
192 et al., 2006), using sLORETTA (Pascual-Marqui, 2002) as implemented in Brainstorm (Tadel et  
193 al., 2011). Brainstorm is documented and freely available for download under the GNU general  
194 public license (<http://neuroimage.usc.edu/brainstorm>). Source reconstruction was constrained to  
195 the cortical mantle of the brain template MNI/Colin27 defined by the Montreal Neurological  
196 Institute (Holmes et al., 1998). Current density for one source orientation (X component) was  
197 estimated for 15,768 equally spaced vertices and the source waveform was mapped at the 68  
198 brain regions of interest as an average taken over all vertices in each region. Multiscale Entropy  
199 was calculated on the source waveform at each ROI for each subject as a measure of brain signal  
200 complexity.

## 201 **Data Analyses**

### 202 *Multiscale Entropy*

203 MSE has been previously validated as a measure of brain signal complexity (Catarino et  
204 al., 2011; McIntosh et al., 2008; Mišić, Mills, Taylor, & McIntosh, 2010). We calculated MSE in

205 two steps using the algorithm available at [www.physionet.org/physiotools/mse](http://www.physionet.org/physiotools/mse). First, the source  
206 EEG and music signals were progressively down-sampled into multiple coarse-grained  
207 timescales where, for scale  $t$ , the time series is constructed by averaging the data points with non-  
208 overlapping windows of length  $t$ . Each element of the coarse-grained time series,  $y_j^{(t)}$ , is  
209 calculated according to Eq. (2):

$$210 \quad y_j^{(t)} = \frac{1}{t} \sum_{i=(j-1)t+1}^{jt} x_i, 1 \leq \frac{N}{t} \quad (1)$$

211 The number of scales is determined by a function of the number of data points in the  
212 signal and MSE was calculated for 100 timescales [sampling rate (512Hz) \* epoch (10,000  
213 ms)/50 time points per epoch = maximum of 102.4 scales].

214 Second, the algorithm calculates the sample entropy ( $S_E$ ) for each coarse-grained  
215 timeseries  $y_j^{(t)}$ :

$$216 \quad S_E(m, r, N) = \ln \frac{\sum_{i=1}^{N-m} n'_i m}{\sum_{i=1}^{N-m} n'_i m + 1} \quad (2)$$

217 Sample entropy quantifies the predictability of a time series by calculating the conditional  
218 probability that any two sequences of  $m$  consecutive data points that are similar to each other  
219 within a certain similarity criterion ( $r$ ) will remain similar at the next point ( $m+1$ ) in the data set  
220 ( $N$ ), where  $N$  is the length of the time series (Richman & Moorman, 2000). In this study, MSE  
221 was calculated with pattern length set to  $m = 2$ , and similarity criterion was to  $r = 0.5$ . The value  
222  $r$  is defined as a proportion of the standard deviation of the original data (Costa, Goldberger, &  
223 Peng, 2004; Richman & Moorman, 2000). MSE estimates were obtained for each participant's  
224 EEG source time series as a mean across single-trial entropy measures for each timescale.

225 Music pieces were imported into Matlab using the *wavread* function at a sampling rate of  
226 11.25 kHz (MathWorks, Inc. Release 2011b). Music auditory signal MSE was subsequently  
227 calculated with the same parameter values and the same number of timescales as the EEG source  
228 MSE.

### 229 ***Complexity Matching***

230 Complexity matching applies Procrustes analysis to measure the equivalence of the MSE  
231 curve for the auditory signal of a song ( $X_I$ ) and the MSE curve of the EEG source time series of a  
232 participant listening to that song ( $X_{2j}$ ), for all  $j$  ROIs individually (Gower, 1975). It minimizes the  
233 sum of the squared deviations between matching corresponding points (landmarks) from each of  
234 the two data sets (MSE curves), allowing for scaling, translation and orthogonal rotation of  $X_I$  to  
235 fit  $X_{2j}$ , where choice of label  $X_I$  or  $X_2$  is arbitrary.  $X_I$  and  $X_{2j}$  must have the same number of  $i$   
236 sample points, or ‘landmarks’, and Procrustes matches  $X_{Ii}$  to  $X_{2ij}$ . In our simple case of two  
237 vectors, the rotation matrix  $T$  such that  $X_I$  best fits  $X_{2j}$  is given as  $T = V'U$  from the singular  
238 value decomposition  $X_I' X_{2j} = U'SV$ . Without translation and scaling this problem is known as  
239 Procrustes rotation. Dissimilarity of  $X_I$  and  $X_{2j}$  is given as the *Procrustes distance*:

$$240 \quad \text{distance} = \sum_{i=1} (X_{1i} - T(X_{2ij}))^2 \quad (3)$$

241 A smaller distance value denotes greater similarity between the two curves, or a closer match  
242 between them. The analysis returns a distance value for each ROI for each participant. Procrustes  
243 distance was calculated using the Matlab function *procrustes* (MathWorks, Inc. Release 2011b).

244 Figure 2 presents a conceptual depiction of our implementation of *complexity matching*.



245

246 **Figure 2.** Complexity matching applies Procrustes' analysis to determine a linear transformation (scaling,  
247 translation and orthogonal rotation) of the points in  $X_2$  (EEG source MSE for a given ROI) to best match the points  
248 in  $X_1$  (song MSE). The goodness-of-fit criterion is the sum of squared errors, and Procrustes distance is the  
249 minimized value of this dissimilarity measure. Distance is standardized by a measure of the scale of  $X_1$ .

250

### 251 ***Spectral Power***

252 Studies have found that MSE and power spectrum density (PSD) provide complementary  
253 information on neural signals (Gudmundsson et al., 2007; McIntosh et al., 2008; Mišić et al.,  
254 2010). For example, both measures follow similarities for time maturational changes, but with  
255 different spatial and temporal patterns (McIntosh et al., 2008; Lippé et al., 2009; Mišić et al.,  
256 2010). Mišić and colleagues (2014) found substantial differences between PSD and MSE effects.  
257 In their sample, individuals with Autism Spectrum Disorder (ASD) displayed only group main  
258 effects on PSD, but a group x task interaction on MSE, and the effects were different both  
259 spatially and temporally. This indicates that MSE captures an aspect of neural information

260 processing in ASD above and beyond what can be gleaned from a traditional analysis of spectral  
261 power.

262 To determine the extent to which training- and task-based differences in MSE are related  
263 to spectral density, we computed PSD for all single-trial time series. Single-trial power spectra  
264 were computed using the Fast Fourier Transform. To capture the relative contribution from each  
265 frequency band, all time series were first normalized to mean = 0 and SD = 1. Given the  
266 sampling rate of 512 Hz and 5,120 data points per trial, the frequency resolution was effectively  
267 0.100 Hz and the analysis was constrained to the [0.100, 90] Hz range, with a notch filter for line  
268 noise at 55-65 Hz.

### 269 *Partial Least Squares*

270 Task partial least squares analysis (PLS) was used to statistically assess task and epoch  
271 related effects in MSE and PSD. Task PLS is a multivariate statistical technique similar to  
272 canonical correlation which employs singular value decomposition (SVD) to extract latent  
273 variables (LVs) that capture the maximum covariance between the task design and neural  
274 activity. Each LV consisted of: (1) a singular vector of design scores, (2) a singular vector of  
275 saliences showing the distribution across brain regions and sampling scales, (3) a singular value  
276 ( $s$ ) representing the covariance between the design scores and the singular image (McIntosh et  
277 al., 1996; McIntosh and Lobaugh, 2004).

278 The statistical significance of each LV was determined using permutation testing (Good,  
279 2000; McIntosh and Lobaugh, 2004). The rows of  $X$  are randomly reordered (permuted) and the  
280 new data were subjected to SVD as before, to obtain a new set of singular values. This procedure  
281 was repeated 500 times to generate a sampling distribution of singular values under the null  
282 hypothesis that there is no association between neural activity and the task. An LV was

283 considered significant if a singular value equal to or greater than that of the LV was present less  
284 than 5% of the time in random permutations (i.e.  $p < 0.05$ ).

285 The reliability of each statistical effect was assessed through bootstrap estimation of  
286 standard error confidence intervals of the singular vector weights in each LV (Efron and  
287 Tibshirani, 1986). Random sampling with replacement of participants within conditions  
288 generated 500 bootstrap samples. In the present study, this process allowed for the assessment of  
289 the relative contribution of brain regions and timescales to each LV. Brain regions with a  
290 salience weight over standard error ratio  $> 3.0$  correspond to a 99% confidence interval and were  
291 considered to be reliable (Sampson et al., 1989).

292 Finally, the dot product of an individual subject's raw MSE data and the singular image  
293 from the LV produces a brain score. The brain score is similar to a factor score that indicates  
294 how strongly an individual subject expresses the patterns on the latent variable and allowed us to  
295 estimate 95% confidence intervals for the effects in each group and task condition.

296 Behavioural PLS (bPLS) is a variation on task PLS for analyzing the relationship  
297 between brain measures and the behaviour (McIntosh and Lobaugh, 2004; Krishnan et al., 2011).  
298 Similar to task PLS the SVD results in mutually orthogonal LVs, where each LV contains 1) a  
299 singular vector of saliences for the behavioural measures, (2) a singular vector of saliences for  
300 brain activity, (3) a singular value ( $s$ ) representing the covariance between the behaviour scores  
301 and the singular image. Behaviour saliences indicate task-dependent differences and brain  
302 saliences indicate ROI-dependent differences in the brain-behaviour correlation.

303

304 **Results**

305 One participant was excluded from the study for mild hearing loss determined by  
306 audiogram, and one other was removed for excessive motion during EEG recording, leaving  
307 N=16 subjects. Two participants did not complete the music-training questionnaire, leaving 14  
308 subjects. For music training, of the N=14 participants: 7 reported no formal training, 1 reported  
309 can play an instrument without formal training, 1 reported less than 1 year of formal music  
310 training, 2 reported between 1-5 years of formal training, and 4 reported more than 5 years of  
311 formal training. Thus, this sample does not include a sufficient number of participants who fulfill  
312 the common requirements for musicianship (e.g. at least 10 years of formal music training,  
313 Fujioka et al., 2004), and we did not proceed with analysis of the effects of music training.

314 Multiscale entropy curves of sound signals from a sample of the songs are visualized in  
315 Figure 3 for illustration purposes.



316

317



318 **Figure 3.** Exemplary multiscale entropy values obtained from the sound signals of a small sample of the songs from  
319 each group. Temporal scale, in milliseconds, refers to the number of data points averaged within non-overlapping  
320 windows, hence the left most values represent fine temporal scales and right more coarse scales.  
321

### 322 *Emotional and Perceptual Tasks*

323 We did not observe any within-task effects of emotional (e.g. stimulating compared to  
324 relaxing) or pitch/tempo (fast compared to slow) dimension ratings on any of our brain measures  
325 (MSE, Procrustes distance or PSD; all PLS  $p > .10$ ). This may be due to the high level of  
326 variance between subjects' emotional responses (Figure 4), or because the continuous nature of  
327 the behaviour ratings is not well suited to the dichotomization necessary for the present types of  
328 analyses.



329

330 **Figure 4.** Example single-subject, single-song behaviour heat maps for the emotional valence task. Note the  
331 variation between individuals in both the valence felt and the variability of the valence within each participant and

332 song (i.e. some participants were stable in one quadrant while some participants felt a greater range during the same  
333 song).  
334

335           Examining both tasks across all four epochs, the emotional task was generally associated  
336 with higher EEG source MSE at time scales below 20, compared to the perceptual task that  
337 showed higher MSE at coarser timescales (>40) (LV = 1,  $p \ll 0$ , Singular Value = 1.81, 31.6%  
338 cross-block covariance; Figure 5; Figure 6). Both tasks showed an increase in MSE at finer  
339 timescales (<20) and a decrease in coarse scale MSE across epochs from the beginning to the end  
340 of the piece of music. The spatial distribution of these effects was such that the emotional task  
341 was associated with higher MSE in finer timescales (Figure 5A) in bilateral bank of the superior  
342 temporal sulcus (bankSTS) and inferior parietal cortex; left hemisphere caudal and rostral middle  
343 frontal, and precentral regions; right mPFC, paracentral, pars triangularis, rostral ACC,  
344 precuneus, SP MT, and ST. The negative bootstrap ratios (Figure 5B) are reliable in bilateral  
345 insula, cingulate, ST, PCC, cuneus, and pericalcarine; left FG, mOFC, SF, parahippocampal,  
346 PCC, precuneus, and lingual; and right hemisphere MF, FP, OFC, IFG, postcentral, entorhinal,  
347 and temporal cortex.

348



349 **Figure 5.** PLS first latent variable for the examination of effects of between tasks and within-task epochs on MSE.  
 350 (A) The bar graph depicts the data-driven contrast highlighting higher MSE on all epochs of the emotional task  
 351 compared to the perceptual task, as well as epoch effects within each task, significantly expressed across the entire  
 352 data set, as determined by permutation tests. (B) Cortical regions at which the contrast was most stable as  
 353 determined by bootstrapping. Values represent the ratio of the parameter estimate for the source divided by the  
 354 bootstrap-derived standard error (roughly z scores). (C) Cortical visualization of stable bootstrap values for fine  
 355 (top) and coarse (bottom) scales.

356  
 357



358  
359 **Figure 6.** Mean MSE across participants for right superior temporal cortex ROI. (A) All temporal scales, B)  
360 Zoomed into visualize higher MSE for the emotional task at fine scales (<39.1 ms).  
361

362 Procrustes' distance was greater during the emotional task than the perceptual task in  
363 most brain sources (LV = 1,  $p = 0$ , Singular Value = 0.81, 54.1% of the cross-block covariance;  
364 Figure 7). All brain regions showed this effect of lower complexity matching on the emotional  
365 task except for bilateral entorhinal, FP, IT, parahippocampal, TP; left bankSTS MT, pars  
366 opercularis, ST; and right FG.  
367



368

369 **Figure 7.** First significant PLS result for the examination of effects of between tasks and within-task epochs on  
370 Procrustes' distance. (A) The bar graph depicts the data-driven contrast highlighting greater distance on all epochs  
371 of the emotional task compared to the perceptual task, as well epoch effects within each task, significantly expressed  
372 across the entire data set, as determined by permutation tests ( $p = 0$ ). (B) Cortical regions at which the contrast was  
373 most stable as determined by bootstrapping. Values represent the ratio of the parameter estimate for the source  
374 divided by the bootstrap-derived standard error (roughly z-scores).

375

376

377

### 378 **Music Reward**

379 The participant sample size ( $N=16$ ) did not provide sufficient power to allow for the  
380 accurate assessment of brain-behaviour relationships on each of the five sub-factors of the  
381 BMRQ. Therefore, an average score across all sub-factors was calculated and used as the overall  
382 measure of music reward. Participant scores on this measure of reward had mean = 3.84 (SD =  
383 0.47) on the 1-5 scale, suggesting this sample overall experiences a medium level of music  
384 related reward. Behavioural PLS assessed the correlation of the participant reward scores with  
385 MSE, distance and PSD on the two tasks and four epochs.

386 A strong positive correlation between MSE and reward was apparent during both tasks  
387 and all epochs. However, had we reported all epochs, the analysis would have included 8  
388 conditions for only a total  $N=16$ ; therefore we opted to not report the results of all epochs of both  
389 tasks in order to increase the validity of the statistical analysis and reduce the likelihood of a  
390 Type II error. Here we only report the positive correlation between MSE and reward during the

391 first and last epoch of both tasks to demonstrate that the effect is relatively stable from the  
392 beginning to the end of the music (PLS LV1  $p = 0$ ,  $r^2 = .38$ , Singular Value = 61.53, 74.4% of  
393 cross block covariance; Figure 8), and note that the pattern of effect similar for the middle two  
394 epochs. This effect was reliable in bilateral medial OFC, inferior frontal, cingulate, temporal and  
395 occipital regions, left precuneus and right superior frontal cortex.  
396



397

398 **Figure 8.** Behaviour PLS result examining the correlation between MSE and BMRQ reward score on both tasks and  
 399 epochs E1 and E4. (A) Brain scores depict participants scores on the brain-behaviour relationship significantly  
 400 expressed by the latent variable, as determined by permutation tests ( $p = 0$ ). (B) Brain regions and frequencies at  
 401 which the relationship was most stable as determined by bootstrapping. Together A and B indicate a positive  
 402 correlation between MSE and BMRQ score in the highlighted regions. (C) Highlights bootstrap values from B for  
 403 spatial regions where effect was stable. Values are taken as peak across scales 20-60. (D) Scatterplot of the brain  
 404 scores from the first epoch with BMRQ reward scores depicts the positive relationship ( $r^2 = .38$ ).  
 405

406 A significant positive correlation was observed between distance and reward during only  
407 the emotional task for all epochs (PLS LV1  $p = .012$ ,  $r^2 = .13$ , Singular Value = 4.29, 72.9% of  
408 cross-block covariance; Figure 9; perceptual task  $p > .10$ ). This effect was localized to the right  
409 hemisphere frontal regions, rACC, IP, inferior and middle temporal, and lOcc.



410

411 **Figure 9.** Behaviour PLS result examining the correlation between complexity distance on all epochs of the  
412 emotional task and BMRQ music reward score. (A) Brain scores depict participants score on the brain-behaviour  
413 relationship significantly expressed by the latent variable, as determined by permutation tests ( $p = .012$ ). (B) Brain  
414 regions and frequencies at which the relationship was most stable as determined by bootstrapping. Together A and B  
415 indicate a positive correlation between distance and BMRQ score in the highlighted regions. (C) Scatterplot of the  
416 brain scores from the first epoch with BMRQ reward scores further displays this positive relationship ( $r^2 = .13$ ).

417

### 418 *Spectral Power*

419 Higher gamma power was observed during the emotional task, and this effect increased  
420 across epochs (PLS LV1,  $p = 0$ , Singular Value = .40, 25.5% of cross-block covariance; Figure  
421 10) in all spatial regions except for bilateral precentral gyrus and left pars triangularis. In  
422 comparison, the perceptual task was dominated by power at lower frequencies at the beginning  
423 of the piece of music, and this effect lessened over time.





424  
425  
426  
427  
428  
429  
430  
431

**Figure 10.** First significant PLS result for the examination of effects of between tasks and within-task epochs on PSD. (A) The bar graph depicts the data-driven contrast highlighting the differences in spectral power profile between tasks, and their similar epoch effect, significantly expressed across the entire data set, as determined by permutation tests ( $p = 0$ ). (B) Cortical regions and frequencies at which the contrast was most stable as determined by bootstrapping. (C) Cortical visualization of stable bootstrap values (peak within each frequency band) for alpha (top) and gamma (bottom) band frequencies.

432 There was a positive correlation between music-derived reward as measured by BMRQ  
 433 score and all spectral frequencies (PLS LV1,  $p = 0$ ,  $r^2 = .57$ , Singular Value = 44.49, 66.46 of  
 434 cross-block covariance; Figure 11). The effect was spatially widespread across 58 of the 68  
 435 parcellated regions.



436 **Figure 11.** bPLS result examining the correlation between PSD and BMRQ reward score on both tasks and epochs  
 437 E1 and E4. (A) Brain scores for the brain-behaviour correlation ( $p = 0$ ). (B) Bootstrap ratios for brain regions and  
 438 frequencies. Together A and B indicate a positive correlation between PSD and BMRQ scores across all frequencies  
 439 in the highlighted regions. (C) Spatial regions from B where effect was stable in the beta band frequency (13-30 Hz).  
 440

441 (D) Scatterplot of the brain scores from the first epoch with BMRQ reward scores depicts the positive relationship  
442 ( $r^2 = .57$ ).  
443

## 444 **Discussion**

445 We found higher complexity matching in widespread brain regions during the perceptual  
446 task than on the emotional task, using Procrustes' distance to compare the MSE of EEG signals  
447 to the MSE of the music itself. This indicates that brain signal complexity more closely  
448 resembles the complexity of the music environment when participants were attending to the  
449 acoustics of the music compared to when they were thinking about how the music makes them  
450 feel. These results support a mapping of environmental information to the brain using complexity  
451 estimation, and that the level of neural 'mirroring' is related to the type of cognitive processing  
452 conducted.

453 Analysis of the EEG MSE values alone found that MSE was higher in relatively finer  
454 timescales (<48.8ms) during the emotional task than the perceptual task, and that both groups  
455 showed an increase of this pattern as the music progressed. These MSE results demonstrate that  
456 emotion is associated with *higher information structure*, while the complexity matching results  
457 indicate the role of *different information structures* from environment input. The MSE results  
458 and the complexity matching results together suggest that the emotional task engaged additional  
459 processes, above and beyond the bottom-up sound perception information.

460 The brain regions that displayed this MSE effect are frequently linked to music cognition  
461 (e.g. right temporal, inferior frontal gyrus; Zatorre et al., 2002) and self-referential emotional  
462 processing (e.g. medial PFC; Amodio & Frith, 2006; Denny et al., 2012; Ochsner et al., 2004).  
463 The effect was also observed in regions that operate as integrative hubs (e.g. medial parietal) that  
464 are densely connected to neighboring regions and have long-range interconnections, enabling  
465 efficient global integration of information necessary for healthy cognitive function (Hagmann et

466 al., 2008; Zamora-López et al., 2010; van den Heuvel and Sporns, 2011). This effect is spatially  
467 and temporally (<48.8ms) similar to increased complexity associated with musical training  
468 (Carpentier et al., 2016), and in other studies where higher MSE has been linked to performance  
469 on cognitive tasks that require higher information processing (Mišić et al., 2010; Heisz et al.,  
470 2012). Additionally, due to longer stimulus presentation, the current study opens up the analysis  
471 to coarser scales, up to 195.3ms, well beyond what has been possible in our previous studies and  
472 other empirical studies of cognition and brain MSE. We observed that MSE was initially higher  
473 in the perceptual task and decreased over time in the temporal scale range of 78.1-195.3ms, and  
474 we are not aware of any previous studies that have examined empirical brain complexity at this  
475 scale. We suggest the possibility that complexity at these slow timescales is indicative of an  
476 initial distributed and re-entrant search for neural templates associated with the music upon first  
477 listening, followed by a decrease of this activity as the brain settles into the neural solution for  
478 ongoing stimulus processing. However, further investigation of the link between cognition and  
479 complexity at these scales is required.

480 Higher music reward scores on the BMRQ were associated with a lower complexity  
481 match and higher EEG MSE. This negative correlation between complexity matching and reward  
482 was only observed on the emotional task, not on the perceptual task. Similar to the emotional  
483 task above, we suggest that reward is associated with additional internal information above and  
484 beyond that of the external stimulus. The complementary MSE and matching results suggest that  
485 music reward requires a brain state that is quantitatively and qualitatively different than the  
486 brain's requirements for music sound perception alone. Music reward is associated with the  
487 activation of multiple different intrinsic processes and high information integration. In other

488 words, music reward is a product of ‘the more you add’ to perception on top of immediate  
489 sensory events.

490         The observed relationship between higher neural information processing and music  
491 reward may be generated by the direct reward experience itself, since pleasurable responses to  
492 music are associated with particular patterns of cortical and subcortical activity not observed  
493 during neutral music perception. Multiple studies have reported connections between music  
494 reward and BOLD activity in vmPFC and OFC, and also IFG, ACC and sensory motor areas  
495 (Blood and Zatorre, 2001; Salimpoor et al., 2013). The relationship between complexity and  
496 reward in the present study was observed in temporal regions, as well as paralimbic and cortical  
497 regions involved in emotional processing (e.g. OFC, insula). Another proposal, not mutually  
498 exclusive to the first, is that the effects capture intermediate internal states that are important to  
499 generating the reward response. For example, the activity may reflect processes related to the  
500 BMRQ factors, such as musical knowledge, or other factors not directly measured by the  
501 BMRQ, like visual imagery or episodic memories evoked by the music (Juslin and Västfjäll,  
502 2008; Vuoskoski and Eerola, 2012). Consistent with this notion, the spatial reliability of the  
503 correlation between distance and music reward suggest that frontal regions (superior, middle,  
504 inferior frontal) were processing internally generated information patterns, while inferior  
505 temporal and anterior cingulate cortex were involved in both the distance and MSE effects.

506         Integration may be a requirement for the commonly highlighted role of expectancy in  
507 music reward. The theory that rewarding emotional responses to music are derived from  
508 expectations and anticipation during music listening was first extensively described by Meyer  
509 (1956; see also Huron, 2006). It explains that the expectations are generated from explicit and  
510 implicit knowledge of music structure and patterns, and composers create emotional arousal by

511 playing with ‘tension and release.’ Anticipation of a familiar rewarding segment of music has  
512 been linked to caudate dopamine release and BOLD activity prior to nucleus accumbens  
513 dopamine activity at peak reward response (Salimpoor et al., 2011). Music expectations were not  
514 behaviourally evaluated in the present study, but there is a logical link between them and brain  
515 signal complexity. Generation of expectations requires sufficient understanding and neural  
516 representation of the structure and patterns in the music. Therefore, it may be that enjoyment of a  
517 piece of music needs to be associated with a minimum amount of information processing that  
518 would allow the listener to appreciate the music as a coherent whole, rather as a sequence of  
519 individual notes. Further investigation of listeners’ enjoyment of individual music pieces, rather  
520 than as general trait music reward, is required to substantiate this theory and make a stronger  
521 connection between brain complexity and music pleasure.

522         While there were no notable differences in complexity between the song sets for each  
523 task, and the sets were selected to be acoustically and thematically similar, the songs were not  
524 identical for both tasks. This leaves open the possibility that other differences in the chosen  
525 songs are responsible for the observed brain differences between songs. This does raise  
526 interesting options for the future study of how different stimuli properties may influence brain  
527 complexity.

#### 528 *Spectral Power*

529         Congruent with the MSE pattern of the trade-off between faster and slower timescales,  
530 we observed higher gamma power in the emotional task, compared to lower frequency power  
531 associated with the perceptual task, as well as a decrease across time in low frequency power in  
532 regions typically linked to music processing and an increase in gamma in these and most other  
533 regions. Gamma activity has been repeatedly implicated as important for perceptual binding and

534 may be associated with binding of musical features at the sensory level and matching of external  
535 acoustic information to internal thought processes for the formation of meaningful concepts  
536 (Bertrand & Tallon-Baudry, 2000; Crone et al., 2001; Keil et al., 1999; Rodriguez et al., 1999;  
537 Tallon-Baudry et al., 1998). Gamma activity is commonly found to be higher in adult musicians  
538 when listening to music and may reflect enhanced binding of musical features (Bhattacharya and  
539 Petsche, 2001, 2005; Shahin et al., 2008; Pallesen et al., 2015). There is also suggestion that  
540 gamma activity may be related to musical expectations (Snyder and Large, 2005). In a study  
541 conducted by Fujioka and colleagues (2009) gamma amplitude increased from baseline for each  
542 tone of a repeating pattern, and this effect continued on trials where the tone was unexpectedly  
543 omitted. None of these studies of the spectral effects of musical training or music listening  
544 conducted spatial analysis; therefore, it is difficult to place this facet of our results in the context  
545 of the other literature. However, our observation of increased gamma power in auditory and  
546 some associative regions is consistent with the hypothesis of the role of gamma in perceptual  
547 binding.

#### 548 *Conclusions*

549 EEG complexity was higher and different from music complexity during the emotional  
550 task in which participants were reflecting on how the music made them feel, compared to the  
551 perceptual task that had participants track pitch and tempo. Complexity matching was also  
552 correlated with BMRQ score, such that music reward was associated with higher neural signal  
553 information and a worse match to the bottom-up music information. These results suggest that  
554 complexity matching can assess the degree to which some cognitive-affective states are  
555 associated with internal information integration which differs from the neural representation of  
556 bottom-up sensory information processing.

557

558 **References**

559 Amodio DM, Frith CD (2006) Meeting of minds: The medial frontal cortex and social cognition.

560 Nat Rev Neurosci 7:268–277.

561 Bertrand O, Tallon-Baudry C (2000) Oscillatory gamma activity in humans : a possible role for

562 object representation. Int J Psychophysiol 38:211–223.

563 Bhattacharya J, Petsche H (2001) Musicians and the gamma band: a secret affair? Neuroreport

564 12:371–374.

565 Bhattacharya J, Petsche H (2005) Phase synchrony analysis of EEG during music perception

566 reveals changes in functional connectivity due to musical expertise. Signal Processing

567 85:2161–2177 Available at: <http://linkinghub.elsevier.com/retrieve/pii/S0165168405002070>

568 [Accessed November 13, 2012].

569 Blood AJ, Zatorre RJ (2001) Intensely pleasurable responses to music correlate with activity in

570 brain regions implicated in reward and emotion. PNAS 98:11818–11823.

571 Bressler SL, Kelso JAS (2001) Cortical coordination dynamics and cognition. Trends Cogn Sci

572 5:26–36 Available at: <http://www.ncbi.nlm.nih.gov/pubmed/11164733>.

573 Carpentier SM, Moreno S, McIntosh AR (2016) Short-term Music Training Enhances Complex,

574 Distributed Neural Communication during Music and Linguistic Tasks. J Cogn Neurosci.

575 Carter FA, Wilson JS, Lawson RH, Bulik CM (1995) Mood Induction Procedure: Importance of

576 Individualising Music. Behav Chang 12:159–161.

577 Catarino A, Churches O, Baron-Cohen S, Andrade A, Ring H (2011) Atypical EEG complexity

578 in autism spectrum conditions: a multiscale entropy analysis. Clin Neurophysiol 122:2375–

579 2383 Available at: <http://www.ncbi.nlm.nih.gov/pubmed/21641861> [Accessed March 11,



- 580 2013].
- 581 Cohen AJ (2001) Music as a source of emotion in film. In: Music and Emotion: Theory and  
582 research (Juslin PN, Sloboda J, eds), pp 249–272. New York: Oxford University Press.
- 583 Costa M, Goldberger A, Peng C-K (2002) Multiscale Entropy Analysis of Complex Physiologic  
584 Time Series. *Phys Rev Lett* 89:6–9 Available at:  
585 <http://link.aps.org/doi/10.1103/PhysRevLett.89.068102> [Accessed March 12, 2012].
- 586 Costa M, Goldberger A, Peng C-K (2005) Multiscale entropy analysis of biological signals. *Phys*  
587 *Rev E* 71:1–18 Available at: <http://link.aps.org/doi/10.1103/PhysRevE.71.021906>  
588 [Accessed March 29, 2012].
- 589 Crone NE, Boatman D, Gordon B, Hao L (2001) Induced electrocorticographic gamma activity  
590 during auditory perception. 112.
- 591 Cross I, Morley I (2009) The evolution of music: theories, definitions and the nature of the  
592 evidence. In: Communicative musicality, (pp61-82) Oxford, Oxford University Press.  
593 (Malloch S, Trevarthen C, eds), pp 61–82. Oxford, UK: Oxford Univeristy Press. Available  
594 at: [http://www.mus.cam.ac.uk/~ic108/PDF/CM\\_CM08.pdf](http://www.mus.cam.ac.uk/~ic108/PDF/CM_CM08.pdf).
- 595 Deco G, Jirsa VK, McIntosh AR (2011) Emerging concepts for the dynamical organization of  
596 resting-state activity in the brain. *Nat Rev Neurosci* 12:43–56 Available at:  
597 <http://www.ncbi.nlm.nih.gov/pubmed/21170073> [Accessed October 26, 2012].
- 598 Delorme A, Makeig S (2004) EEGLAB: an open source toolbox for analysis of single-trial EEG  
599 dynamics including independent component analysis. *J Neurosci Methods* 134:9–21.
- 600 Denny BT, Kober H, Wager TD, Ochsner KN (2012) A Meta-analysis of Functional  
601 Neuroimaging Studies of Self- and Other Judgments Reveals a Spatial Gradient for  
602 Mentalizing in Medial Prefrontal Cortex. *J Cogn Neurosci* 24:1742–1752 Available at:

- 603 [http://www.mitpressjournals.org/doi/10.1162/jocn\\_a\\_00233](http://www.mitpressjournals.org/doi/10.1162/jocn_a_00233).
- 604 Desikan RS, Ségonne F, Fischl B, Quinn BT, Dickerson BC, Blacker D, Buckner RL, Dale AM,  
605 Maguire RP, Hyman BT, Albert MS, Killiany RJ (2006) An automated labeling system for  
606 subdividing the human cerebral cortex on MRI scans into gyral based regions of interest.  
607 *Neuroimage* 31:968–980.
- 608 Efron B, Tibshirani R (1986) Bootstrap methods for standard errors, confidence intervals, and  
609 other measures of statistical accuracy. *Stat Sci* 1:54–77 Available at:  
610 <http://www.jstor.org/stable/10.2307/2245500> [Accessed April 17, 2013].
- 611 Fujioka T, Trainor LJ, Large EW, Ross B (2009) Beta and gamma rhythms in human auditory  
612 cortex during musical beat processing. *Ann N Y Acad Sci* 1169:89–92.
- 613 Ghosh A, Rho Y, McIntosh AR, Kötter R, Jirsa VK (2008) Noise during rest enables the  
614 exploration of the brain’s dynamic repertoire. *PLoS Comput Biol* 4:e1000196 Available at:  
615 [http://www.pubmedcentral.nih.gov/articlerender.fcgi?artid=2551736&tool=pmcentrez&ren](http://www.pubmedcentral.nih.gov/articlerender.fcgi?artid=2551736&tool=pmcentrez&rendertype=abstract)  
616 [dertype=abstract](http://www.pubmedcentral.nih.gov/articlerender.fcgi?artid=2551736&tool=pmcentrez&rendertype=abstract) [Accessed November 10, 2012].
- 617 Good P (2000) *Permutation, Parametric and Bootstrap Tests of Hypotheses*. Huntington Beach,  
618 USA: Springer Science+Business Media, Inc.
- 619 Gower JC (1975) Generalized Procrustes Analysis. *Psychometrika* 40.
- 620 Gudmundsson S, Runarsson TP, Sigurdsson S, Eiriksdottir G, Johnsen K (2007) Reliability of  
621 quantitative EEG features. *Clin Neurophysiol* 118:2162–2171.
- 622 Hagmann P, Cammoun L, Gigandet X, Meuli R, Honey CJ, Wedeen VJ, Sporns O (2008)  
623 Mapping the structural core of human cerebral cortex. *PLoS Biol* 6:e159 Available at:  
624 [http://www.pubmedcentral.nih.gov/articlerender.fcgi?artid=2443193&tool=pmcentrez&ren](http://www.pubmedcentral.nih.gov/articlerender.fcgi?artid=2443193&tool=pmcentrez&rendertype=abstract)  
625 [dertype=abstract](http://www.pubmedcentral.nih.gov/articlerender.fcgi?artid=2443193&tool=pmcentrez&rendertype=abstract) [Accessed November 3, 2012].

- 626 Heisz JJ, Shedden JM, McIntosh AR (2012) Relating brain signal variability to knowledge  
627 representation. *Neuroimage* 63:1384–1392 Available at:  
628 <http://www.ncbi.nlm.nih.gov/pubmed/22906786> [Accessed March 11, 2013].
- 629 Holmes CJ, Hoge R, Collins DL, Woods R, Toda AW, Evans AC (1998) Enhancement of MR  
630 Images Using Registration for Signal Averaging. *J Comput Assist Tomogr* 22:324–333.
- 631 Hunter PG, Schellenberg EG (2010) Music Perception. In: *Springer Handbook of Auditory*  
632 *Research* (Jones MR, Fay RR, N PA, eds), pp 129–164. New York, USE: Springer.
- 633 Huron D (2006) *Sweet Anticipation: music and the psychology of expectation*. Cambridge,  
634 Massachusetts: MIT Press.
- 635 Juslin PN, Laukka P (2004) Expression, Perception, and Induction of Musical Emotions: A  
636 Review and a Questionnaire Study of Everyday Listening. *J New Music Res* 33:217–238  
637 Available at: <http://www.tandfonline.com/doi/abs/10.1080/0929821042000317813>.
- 638 Juslin PN, Sloboda J (2010) *Handbook of Music Emotions* (Juslin PN, Sloboda J, eds). Oxford,  
639 New York: Oxford University Press.
- 640 Juslin PN, Västfjäll D (2008) Emotional responses to music: the need to consider underlying  
641 mechanisms. *Behav Brain Sci* 31:559–621 Available at:  
642 [http://www.ncbi.nlm.nih.gov/sites/entrez?Db=pubmed&DbFrom=pubmed&Cmd=Link&Li](http://www.ncbi.nlm.nih.gov/sites/entrez?Db=pubmed&DbFrom=pubmed&Cmd=Link&LinkName=pubmed_pubmed&LinkReadableName=RelatedArticles&IdsFromResult=18826699&ordinalpos=3&itool=EntrezSystem2.PEntrez.Pubmed.Pubmed_ResultsPanel.Pubmed_RVDocSum)  
643 [nkName=pubmed\\_pubmed&LinkReadableName=Related](http://www.ncbi.nlm.nih.gov/sites/entrez?Db=pubmed&DbFrom=pubmed&Cmd=Link&LinkName=pubmed_pubmed&LinkReadableName=RelatedArticles&IdsFromResult=18826699&ordinalpos=3&itool=EntrezSystem2.PEntrez.Pubmed.Pubmed_ResultsPanel.Pubmed_RVDocSum)  
644 [Articles&IdsFromResult=18826699&ordinalpos=3&itool=EntrezSystem2.PEntrez.Pubmed.](http://www.ncbi.nlm.nih.gov/sites/entrez?Db=pubmed&DbFrom=pubmed&Cmd=Link&LinkName=pubmed_pubmed&LinkReadableName=RelatedArticles&IdsFromResult=18826699&ordinalpos=3&itool=EntrezSystem2.PEntrez.Pubmed.Pubmed_ResultsPanel.Pubmed_RVDocSum)  
645 [Pubmed\\_ResultsPanel.Pubmed\\_RVDocSum.](http://www.ncbi.nlm.nih.gov/sites/entrez?Db=pubmed&DbFrom=pubmed&Cmd=Link&LinkName=pubmed_pubmed&LinkReadableName=RelatedArticles&IdsFromResult=18826699&ordinalpos=3&itool=EntrezSystem2.PEntrez.Pubmed.Pubmed_ResultsPanel.Pubmed_RVDocSum)
- 646 Keil a, Müller MM, Ray WJ, Gruber T, Elbert T (1999) Human gamma band activity and  
647 perception of a gestalt. *J Neurosci* 19:7152–7161.
- 648 Krishnan A, Williams LJ, McIntosh AR, Abdi H (2011) Partial Least Squares (PLS) methods for

- 649       neuroimaging: a tutorial and review. *Neuroimage* 56:455–475 Available at:  
650       <http://www.ncbi.nlm.nih.gov/pubmed/20656037> [Accessed November 6, 2012].
- 651   Lippé S, Kovačević N, McIntosh AR (2009) Differential maturation of brain signal complexity  
652       in the human auditory and visual system. *Front Hum Neurosci* 3:48 Available at:  
653       [http://www.pubmedcentral.nih.gov/articlerender.fcgi?artid=2783025&tool=pmcentrez&ren](http://www.pubmedcentral.nih.gov/articlerender.fcgi?artid=2783025&tool=pmcentrez&rendertype=abstract)  
654       dertype=abstract [Accessed April 30, 2013].
- 655   Mas-Herrero E, Marco-Pallares J, Lorenzo-Seva U, Zatorre RJ, Rodriguez-Fornells A (2013)  
656       Individual Differences in Music Reward Experience. *Music Percept* 31:118–138.
- 657   McIntosh AR (2000) Towards a network theory of cognition. *Neural Networks* 13:861–870  
658       Available at: <http://www.ncbi.nlm.nih.gov/pubmed/11156197>.
- 659   McIntosh AR, Bookstein FL, Haxby J V, Grady CL (1996) Spatial pattern analysis of functional  
660       brain images using partial least squares. *Neuroimage* 3:143–157 Available at:  
661       <http://www.ncbi.nlm.nih.gov/pubmed/9345485>.
- 662   McIntosh AR, Kovačević N, Itier RJ (2008) Increased brain signal variability accompanies lower  
663       behavioral variability in development. *PLoS Comput Biol* 4:e1000106 Available at:  
664       [http://www.pubmedcentral.nih.gov/articlerender.fcgi?artid=2429973&tool=pmcentrez&ren](http://www.pubmedcentral.nih.gov/articlerender.fcgi?artid=2429973&tool=pmcentrez&rendertype=abstract)  
665       dertype=abstract [Accessed November 20, 2012].
- 666   McIntosh AR, Lobaugh NJ (2004) Partial least squares analysis of neuroimaging data:  
667       applications and advances. *Neuroimage* 23 Suppl 1:S250-63 Available at:  
668       <http://www.ncbi.nlm.nih.gov/pubmed/15501095> [Accessed November 5, 2012].
- 669   Meyer LB (1956) *Emotion and Meaning in Music*. Chicago, Il, USA: The University of Chicago  
670       Press.
- 671   Mišić B, Doesburg SM, Fatima Z, Videll J, Vakorin VA, Taylor MJ, McIntosh AR (2014)

- 672 Coordinated Information Generation and Mental Flexibility: Large-Scale Network  
673 Disruption in Children with Autism. *Cereb Cortex* Available at:  
674 <http://cercor.oxfordjournals.org/content/early/2014/04/25/cercor.bhu082%5Cnhttp://cercor.oxfordjournals.org/content/early/2014/04/25/cercor.bhu082.full.pdf%5Cnhttp://www.ncbi.nlm.nih.gov/pubmed/24770713%5Cnhttp://cercor.oxfordjournals.org/content/early/2014/04/>  
675  
676  
677 Mišić B, Mills T, Taylor MJ, McIntosh AR (2010) Brain noise is task dependent and region  
678 specific. *J Neurophysiol* 104:2667–2676 Available at:  
679 <http://www.ncbi.nlm.nih.gov/pubmed/20844116> [Accessed June 11, 2013].  
680 Ochsner KN, Knierim K, Ludlow DH, Hanelin J, Ramachandran T, Glover G, Mackey SC  
681 (2004) Reflecting upon Feelings: An fMRI Study of Neural Systems Supporting the  
682 Attribution of Emotion to Self and Other. *J Cogn Neurosci* 16:1746–1772 Available at:  
683 <http://www.mitpressjournals.org/doi/10.1162/0898929042947829>.  
684 Pallesen KJ, Bailey CJ, Brattico E, Gjedde A, Palva JM, Palva S (2015) Experience drives  
685 synchronization: The phase and amplitude dynamics of neural oscillations to musical chords  
686 are differentially modulated by musical expertise. *PLoS One* 10:1–21 Available at:  
687 <http://dx.doi.org/10.1371/journal.pone.0134211>.  
688 Pascual-Marqui RD (2002) Standardized low resolution brain electromagnetic tomography  
689 (sLORETTA): technical details. *Methods Find Exp Clin Pharmacol* 24D:5–12.  
690 Price CJ (2010) The anatomy of language: a review of 100 fMRI studies published in 2009. *Ann*  
691 *N Y Acad Sci* 1191:62–88 Available at: <http://www.ncbi.nlm.nih.gov/pubmed/20392276>  
692 [Accessed September 16, 2013].  
693 Richman JS, Moorman JR (2000) Physiological time-series analysis using approximate entropy  
694 and sample entropy. *Am J Physiol - Hear Circ Physiol*:H2039–H2049.

- 695 Rodriguez E, George N, Lachaux J-P, Martinerie J, Renault B, Varela FJ (1999) Perception's  
696 shadow : long- distance synchronization of human brain activity. *Nature* 397:430–433.
- 697 Salimpoor VN, Benovoy M, Larcher K, Dagher A, Zatorre RJ (2011) Anatomically distinct  
698 dopamine release during anticipation and experience of peak emotion to music. *Nat*  
699 *Neurosci* 14:257–262 Available at: <http://www.ncbi.nlm.nih.gov/pubmed/21217764>  
700 [Accessed May 22, 2013].
- 701 Salimpoor VN, van den Bosch I, Kovačević N, McIntosh AR, Dagher A, Zatorre RJ (2013)  
702 Interactions between the nucleus accumbens and auditory cortices predict music reward  
703 value. *Science* 340:216–219 Available at: <http://www.ncbi.nlm.nih.gov/pubmed/23580531>  
704 [Accessed May 21, 2013].
- 705 Sampson PD, Streissguth AP, Barr HM, Bookstein FL (1989) Neurobehavioral effects of  
706 prenatal alcohol: Part II. Partial least squares analysis. *Neurotoxicol Teratol* 11:477–491  
707 Available at: <http://www.ncbi.nlm.nih.gov/pubmed/2593987>.
- 708 Shahin AJ, Roberts LE, Chau W, Trainor LJ, Miller LM (2008) Music training leads to the  
709 development of timbre-specific gamma band activity. *Neuroimage* 41:113–122.
- 710 Snyder JS, Large EW (2005) Gamma-band activity reflects the metric structure of rhythmic tone  
711 sequences. *Brain Res Cogn Brain Res* 24:117–126 Available at:  
712 <http://www.ncbi.nlm.nih.gov/pubmed/15922164> [Accessed January 30, 2013].
- 713 Tadel F, Baillet S, Mosher J, Pantazis D, Leahy RM (2011) Brainstorm: a user-friendly  
714 application for MEG/EEG analysis. *Comput Intell Neurosci* Available at:  
715 <http://dl.acm.org/citation.cfm?id=1992539> [Accessed January 10, 2013].
- 716 Tallon-Baudry C, Bertrand O, Peronnet F, Pernier J (1998) Induced gamma-band activity during  
717 the delay of a visual short-term memory task in humans. *J Neurosci* 18:4244–4254

- 718 Available at: <http://www.ncbi.nlm.nih.gov/pubmed/9592102>.
- 719 Tononi G, Sporns O, Edelman GM (1994) A measure for brain complexity: relating functional  
720 segregation and integration in the nervous system. *Proc Natl Acad Sci U S A* 91:5033–5037
- 721 Available at:  
722 <http://www.pubmedcentral.nih.gov/articlerender.fcgi?artid=43925&tool=pmcentrez&render>  
723 [type=abstract](http://www.pubmedcentral.nih.gov/articlerender.fcgi?artid=43925&tool=pmcentrez&render).
- 724 Tononi G, Sporns O, Edelman GM (1996) A complexity measure for selective matching of  
725 signals by the brain. *Proc Natl Acad Sci U S A* 93:3422–3427.
- 726 van den Heuvel MP, Sporns O (2011) Rich-club organization of the human connectome. *J*  
727 *Neurosci* 31:15775–15786 Available at: <http://www.ncbi.nlm.nih.gov/pubmed/22049421>  
728 [Accessed May 21, 2013].
- 729 Västfjäll D (2001) Emotion induction through music: A review of the musical mood induction  
730 procedure. *Music Sci* 5:173–211 Available at:  
731 <http://journals.sagepub.com/doi/10.1177/10298649020050S107>.
- 732 Vuoskoski JK, Eerola T (2012) Can sad music really make you sad? indirect measures of  
733 affective states induced by music and autobiographical memories. *Psychol Aesthetics, Creat*  
734 *Arts* 6:204–213.
- 735 Zamora-López G, Zhou C, Kurths J (2010) Cortical hubs form a module for multisensory  
736 integration on top of the hierarchy of cortical networks. *Front Neuroinform* 4:1 Available at:  
737 [http://www.pubmedcentral.nih.gov/articlerender.fcgi?artid=2859882&tool=pmcentrez&ren](http://www.pubmedcentral.nih.gov/articlerender.fcgi?artid=2859882&tool=pmcentrez&render)  
738 [dertype=abstract](http://www.pubmedcentral.nih.gov/articlerender.fcgi?artid=2859882&tool=pmcentrez&render) [Accessed June 13, 2013].
- 739 Zatorre RJ, Belin P, Penhune VB (2002) Structure and function of auditory cortex: music and  
740 speech. *Trends Cogn Sci* 6:37–46 Available at:

741 <http://www.ncbi.nlm.nih.gov/pubmed/11849614>.

742
